# Supplementary material for: An aluminum(iii) picket fence phthalocyanine-based heterogeneous catalyst for ring-expansion carbonylation of epoxides
Source: Royal Society of Chemistry journal article supplement (doi:10.1039/c8ta11877a), 2019-01-01
Supplement: c8ta11877a1.pdf [file c8ta11877a1.pdf]

**An aluminum(III) picket fence phthalocyanine-based heterogeneous catalyst for ring-expansion carbonylation of epoxides**

Jianwei Jiang and Sungho Yoon\*

**Supporting Information**

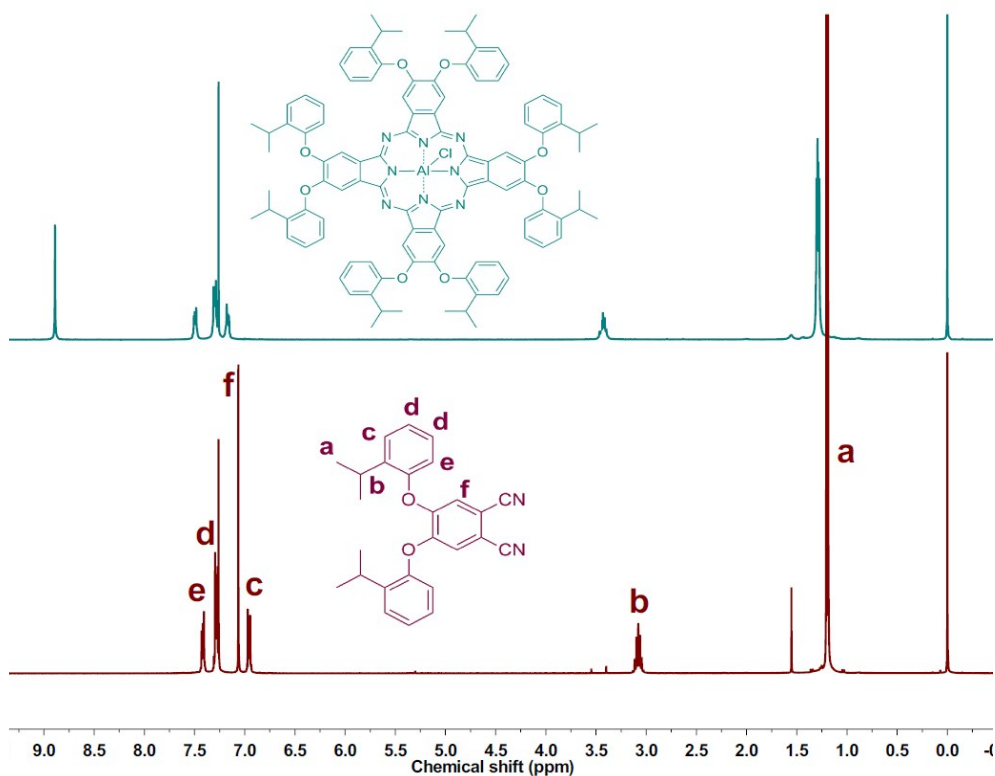

**Fig. S1**  $^1\text{H}$  NMR spectra of the ligand and  $\text{AlPc}'\text{Cl}$  monomer.

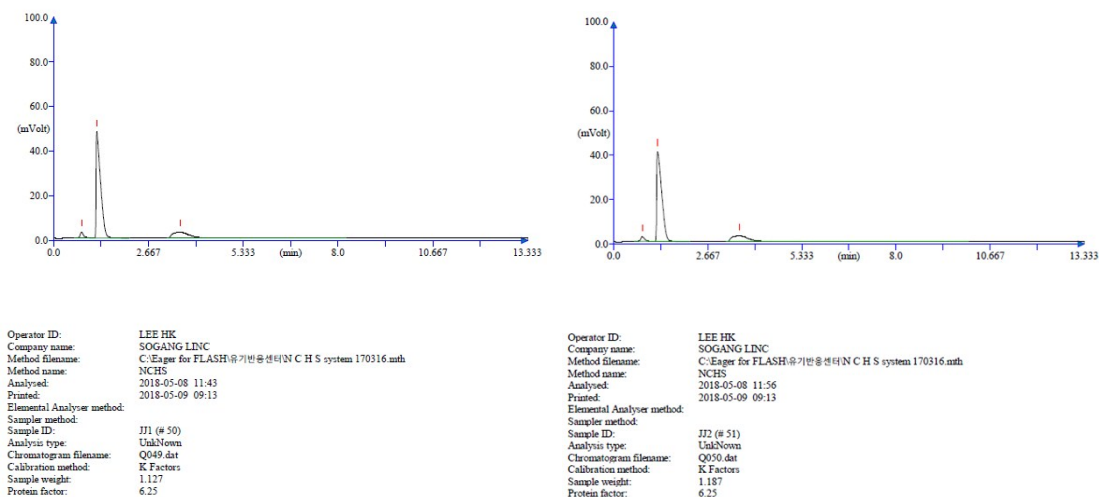

| Element Name | Ret. Time | Area | BC      | Area ratio | K factor              |
|--------------|-----------|------|---------|------------|-----------------------|
| Nitrogen     | 6.6211    | 47   | 167680  | RS         | 24.536740 .202058E+07 |
| Carbon       | 75.4500   | 73   | 4114309 | RS         | 1.000000 .480874E+07  |
| Hydrogen     | 5.9748    | 214  | 976235  | RS         | 4.214465 .144163E+08  |
| Totals       | 88.0459   |      | 5258223 |            |                       |

| Element Name | Ret. Time | Area | BC      | Area ratio | K factor              |
|--------------|-----------|------|---------|------------|-----------------------|
| Nitrogen     | 6.1183    | 49   | 163648  | RS         | 24.267260 .202058E+07 |
| Carbon       | 69.1305   | 75   | 3971288 | RS         | 1.000000 .480874E+07  |
| Hydrogen     | 5.6067    | 214  | 964933  | RS         | 4.115616 .144163E+08  |
| Totals       | 80.8556   |      | 5099868 |            |                       |

**Fig. S2** Elemental analysis of the ligand (left) and  $\text{AlPc}'\text{Cl}$  monomer (right).

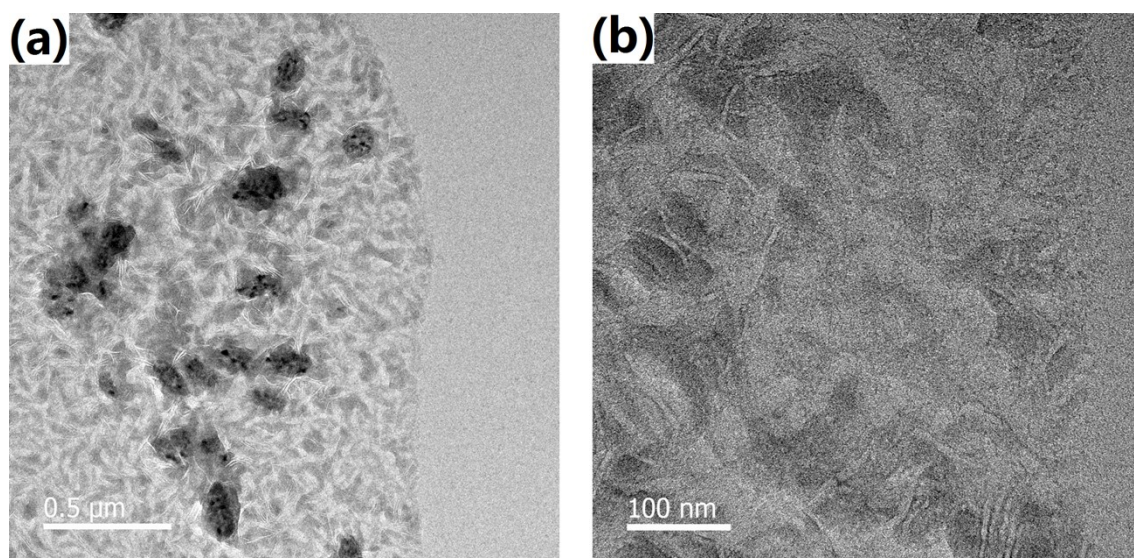

**Fig. S3** TEM images of the network 2.

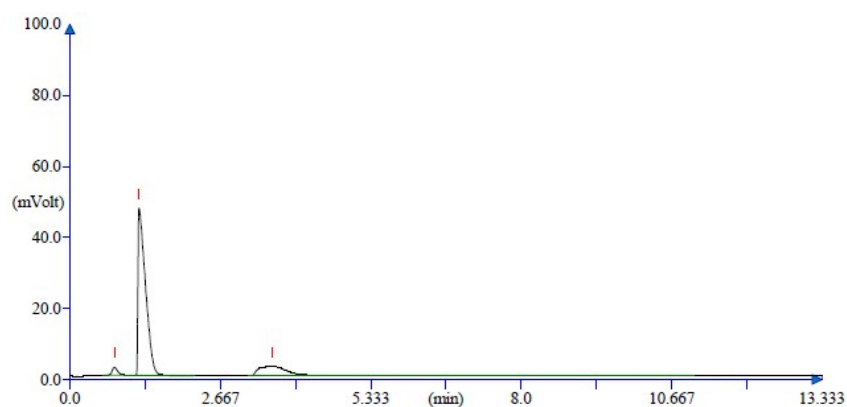

Operator ID: LEE HK  
 Company name: SOGANG LINC  
 Method filename: C:\Eager for FLASH\유기반응센터\N C H S system 170316.mth  
 Method name: NCHS  
 Analysed: 2018-05-08 12:09  
 Printed: 2018-05-09 09:14  
 Elemental Analyser method:  
 Sampler method:  
 Sample ID: JJ3 (# 52)  
 Analysis type: UnkNown  
 Chromatogram filename: Q051.dat  
 Calibration method: K Factors  
 Sample weight: 1.343  
 Protein factor: 6.25

| Element Name | Ret. Time | Area | BC         | Area ratio | K factor    |
|--------------|-----------|------|------------|------------|-------------|
| Nitrogen     | 5.3248    | 48   | 161400 RS  | 27.257450  | .202058E+07 |
| Carbon       | 67.7286   | 74   | 4399339 RS | 1.000000   | .480874E+07 |
| Hydrogen     | 5.3120    | 215  | 1033964 RS | 4.254828   | .144163E+08 |
| Totals       | 78.3654   |      | 5594703    |            |             |

**Fig. S4** Elemental analysis of the network 2.

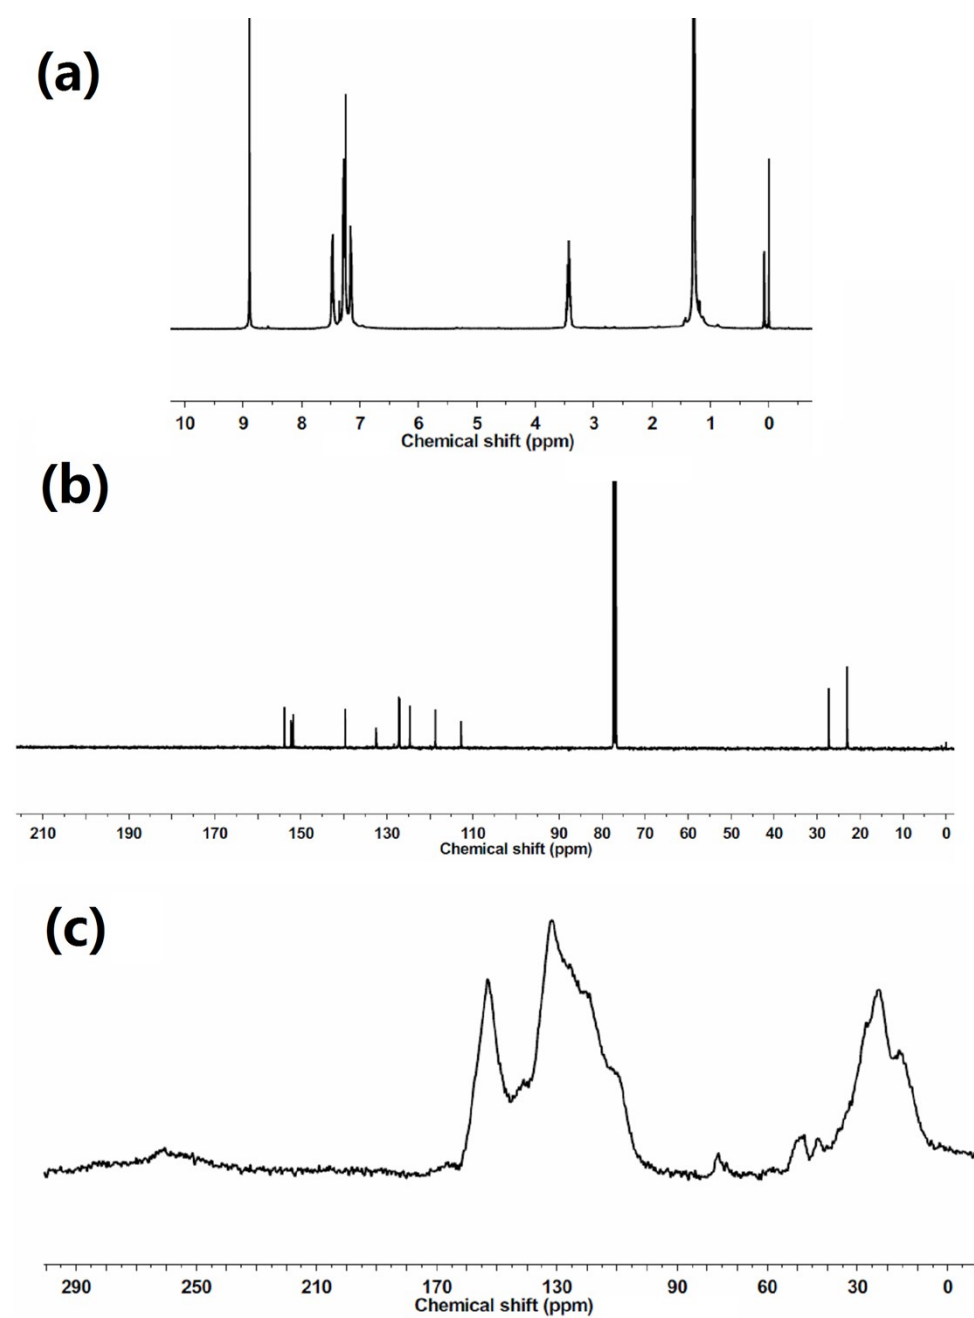

**Fig. S5.**  $^1\text{H}$  NMR (a) and  $^{13}\text{C}$  NMR (b) spectra of monomer **1**. The solid-state  $^{13}\text{C}$  NMR of network **2** (c).

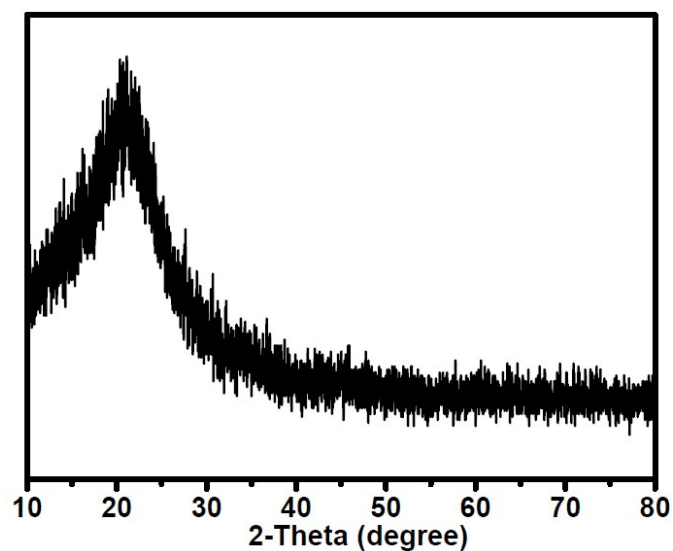

**Fig. S6** XRD pattern of the network 2.

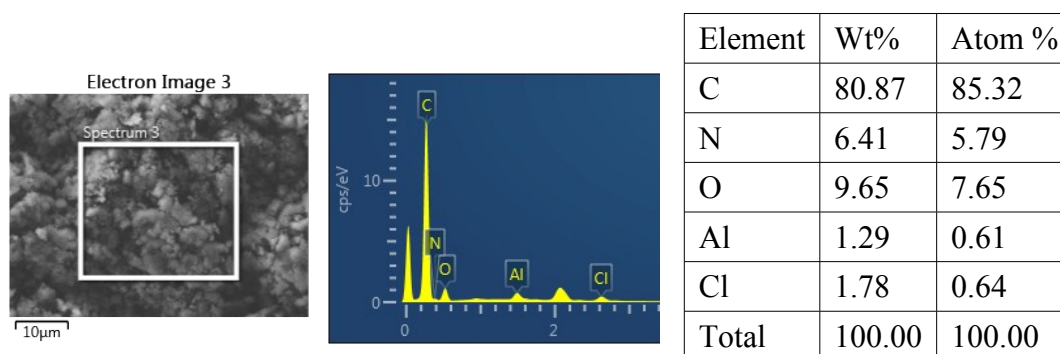

the atomic ratio of Al/N:  $\frac{0.61}{5.79} = 0.1053$

Theoretically, the ratio of Al/N:  $1/8 = 0.125$

Therefore, the proportion of Al metalated Pc' ring in the networks:

$$\frac{0.1053}{0.125} \times 100\% = 84.2\%$$

**Fig. S7** SEM and EDX of the network 2.

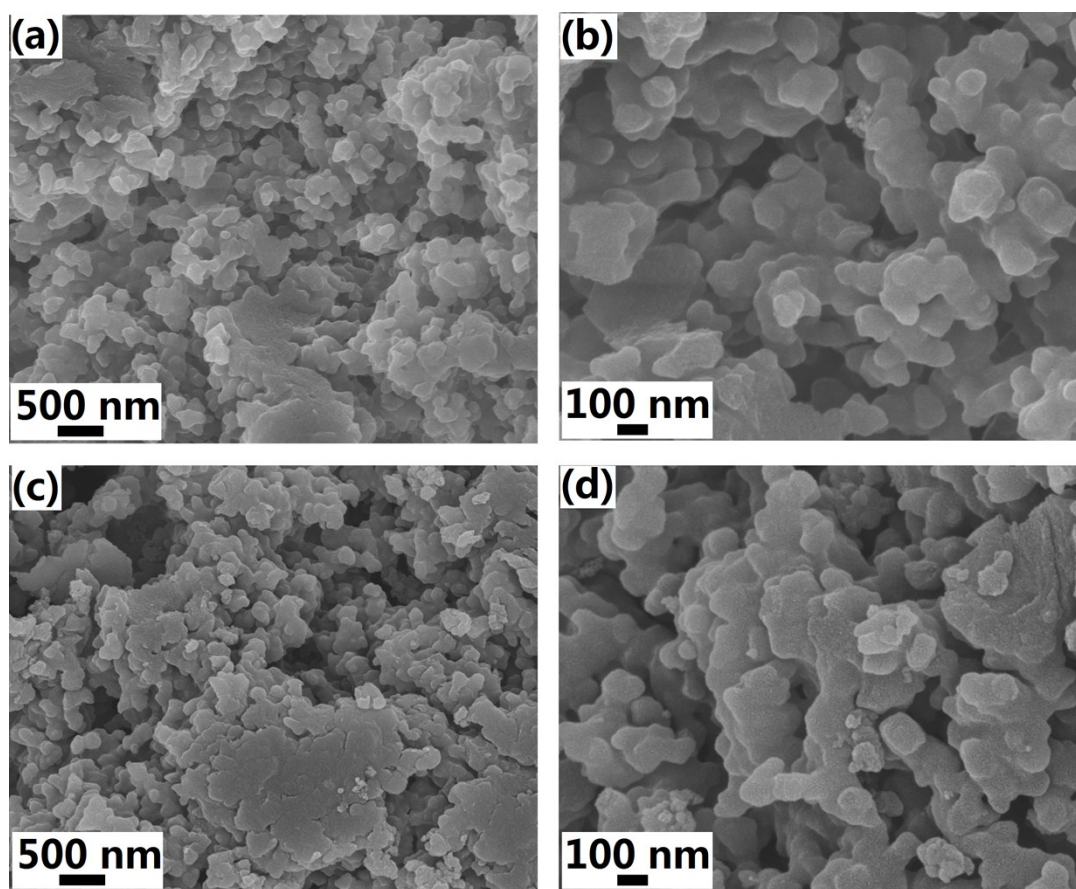

**Fig. S8** SEM images of the network 2 (a, b) and catalyst 3 (c, d).

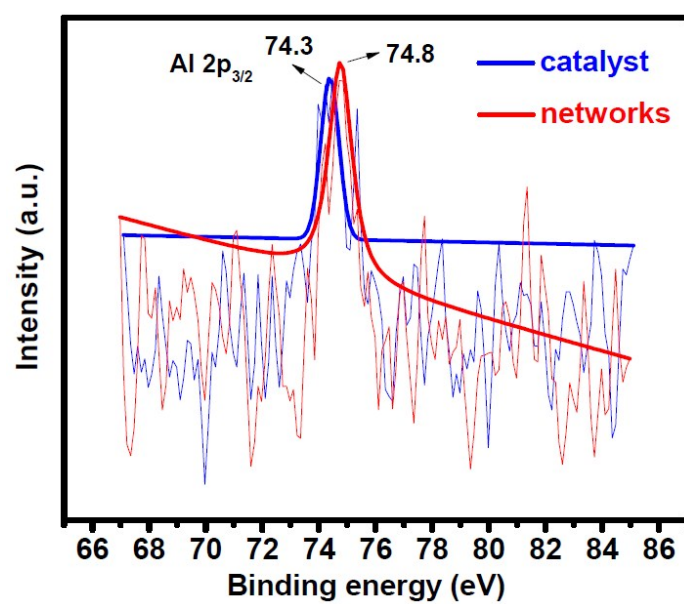

**Fig. S9** Al ( $2p_{3/2}$ ) electron binding energy of the network 2 and catalyst 3.

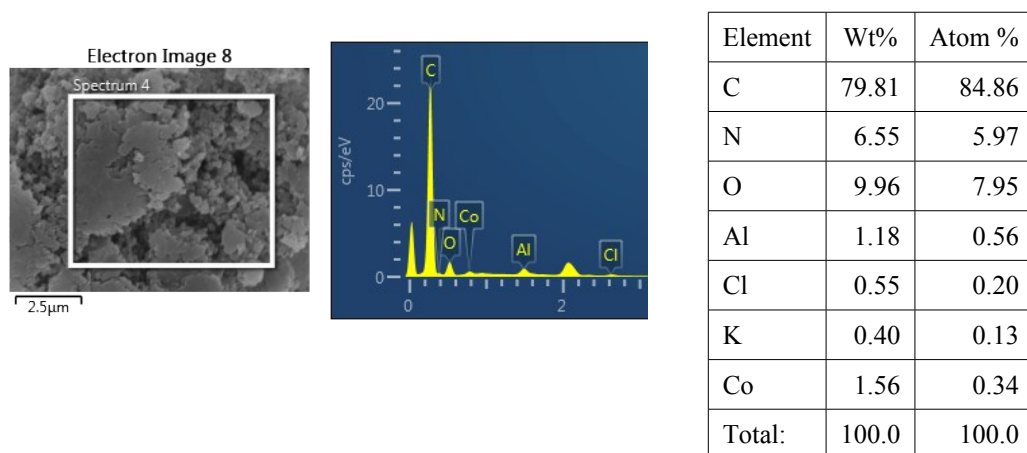

**Fig. S10** SEM and EDX of catalyst **3**.

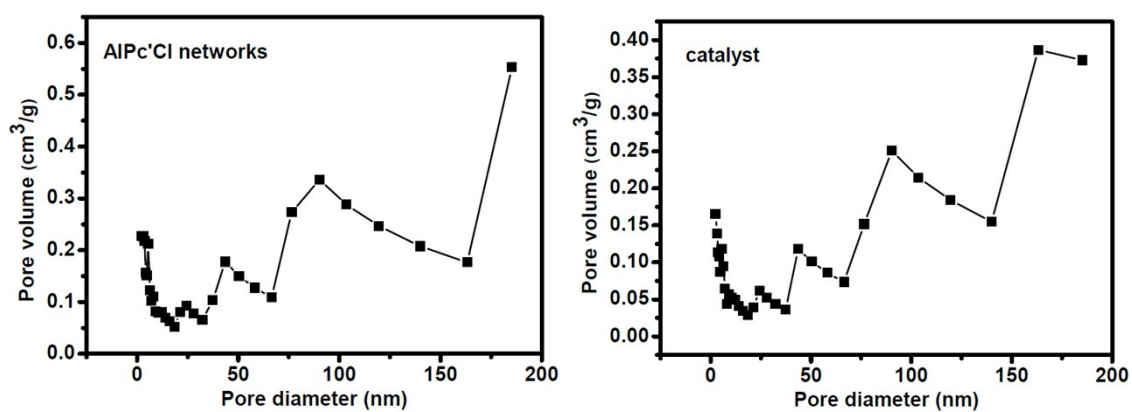

**Fig. S11** BJH pore-size distribution for the network **2** and catalyst **3**.

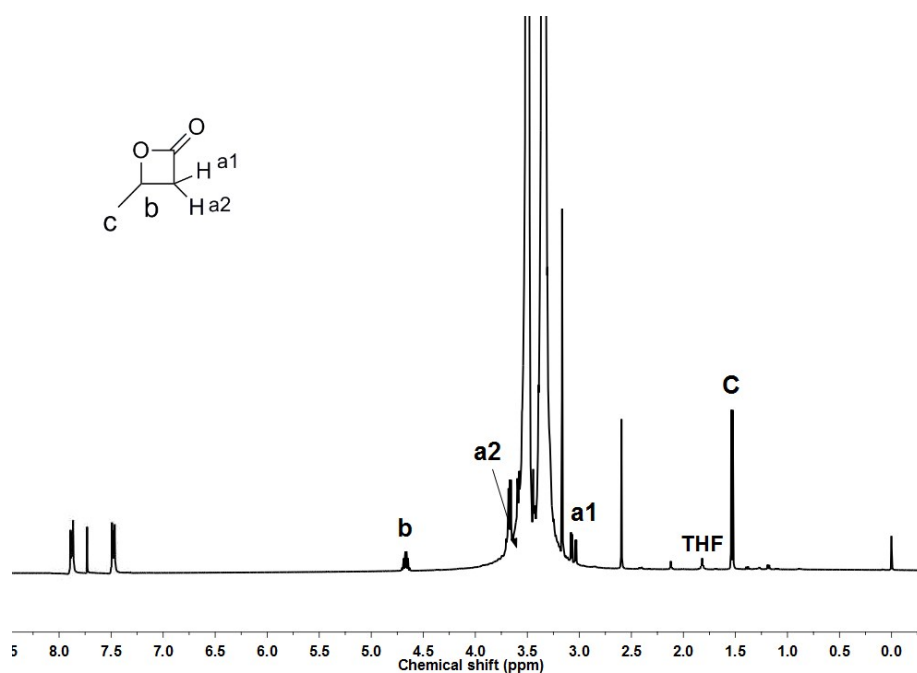

**Fig. S12-1** <sup>1</sup>H NMR spectrum of the product from PO carbonylation in DME solvent using AlPc'-based heterogeneous catalyst **3**, 40 bar CO, 23 °C, 1 h (Table 1, entry 1).

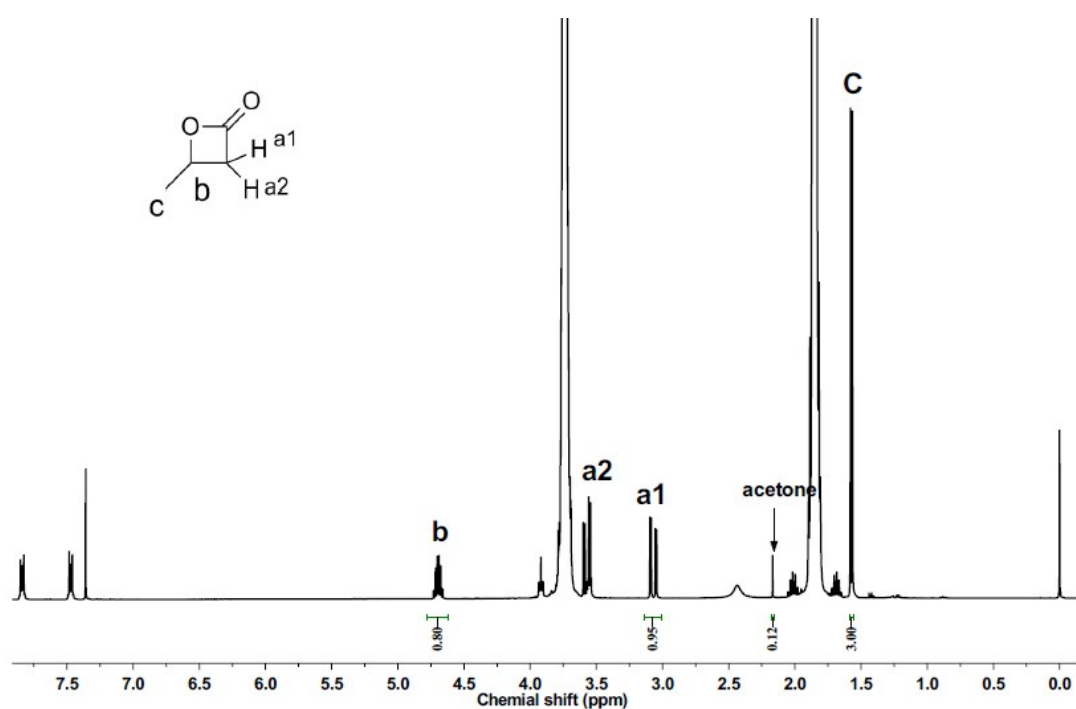

**Fig. S12-2** <sup>1</sup>H NMR spectrum of the product from PO carbonylation using an *in situ* generated catalyst from AlPcCl and Co<sub>2</sub>(CO)<sub>8</sub>. (4 mol% AlPcCl, 6 mol% Co<sub>2</sub>(CO)<sub>8</sub>, 0.5 M PO in THF, 40 bar CO, 23 °C, 1 h).

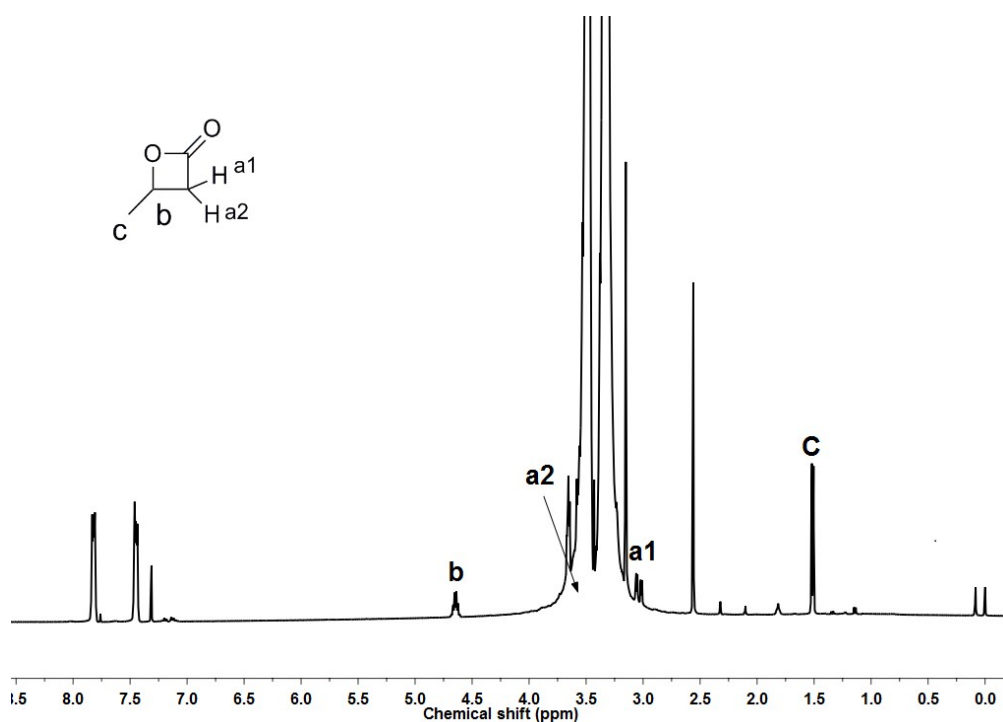

**Fig. S13**  $^1\text{H}$  NMR spectrum of the product from PO carbonylation in DME solvent using catalyst **3**, 10 bar CO, 23 °C, 1 h (Table 1, entry 2).

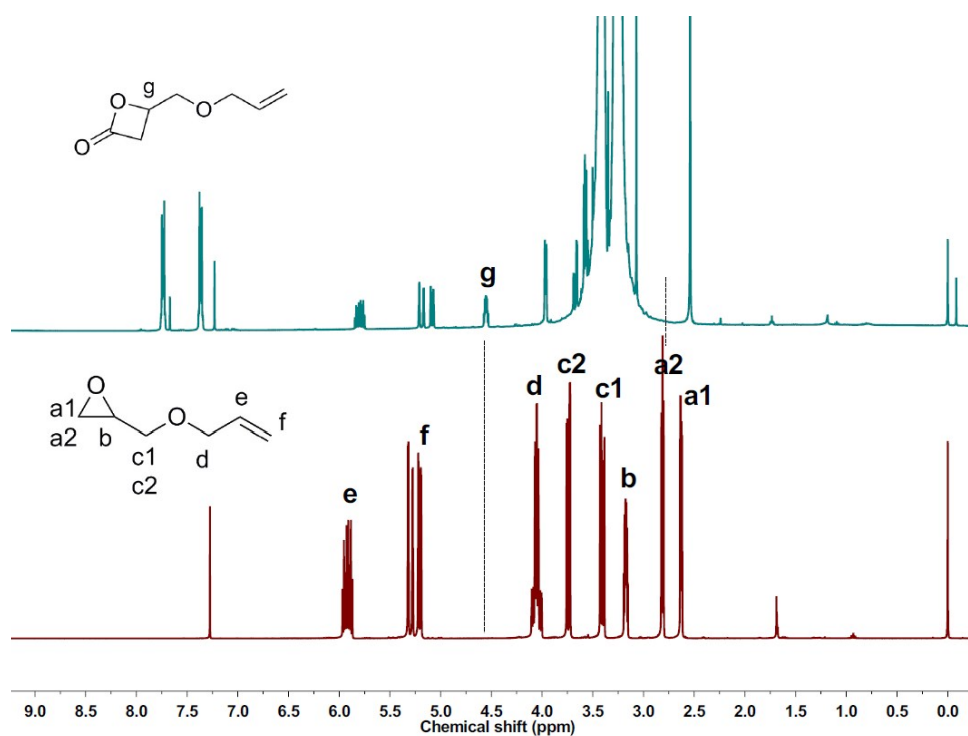

**Fig. S14**  $^1\text{H}$  NMR spectrum of the product from allyl glycidyl ether carbonylation (Table 1, entry 3).

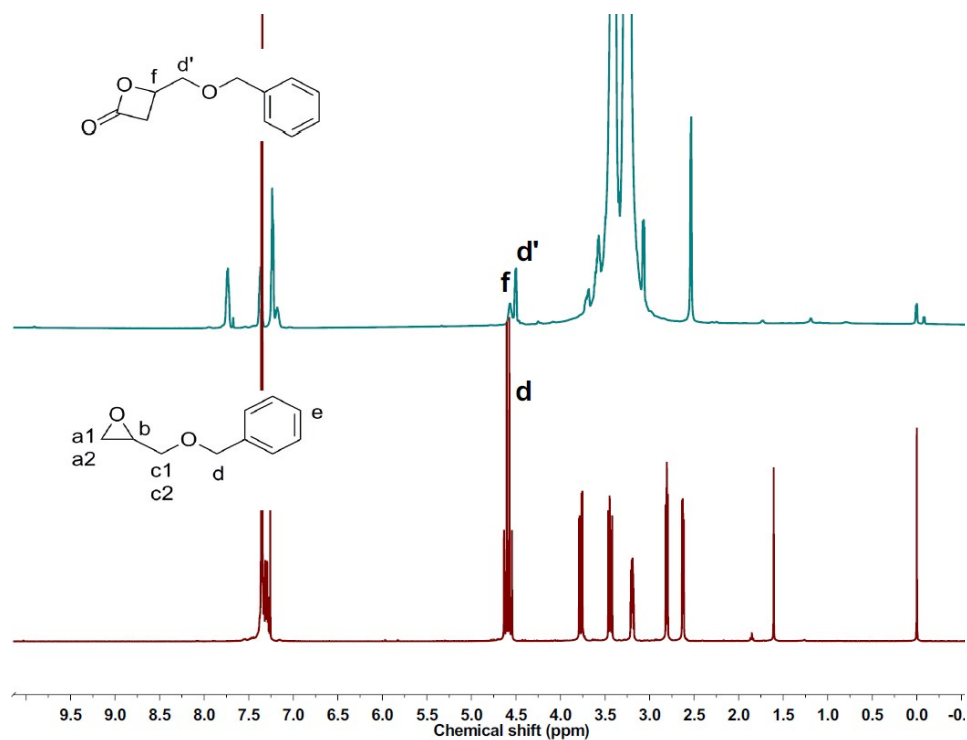

**Fig. S15**  $^1\text{H}$  NMR spectrum of the product from benzyl glycidyl ether carbonylation (Table 1, entry 4).

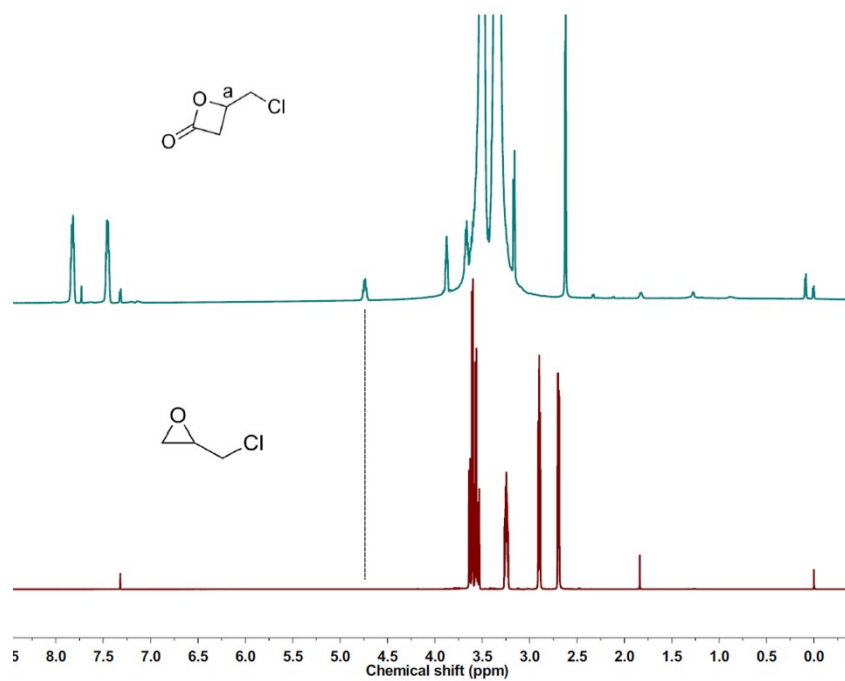

**Fig. S16**  $^1\text{H}$  NMR spectrum of the product from epichlorohydrin carbonylation (Table 1, entry 5).

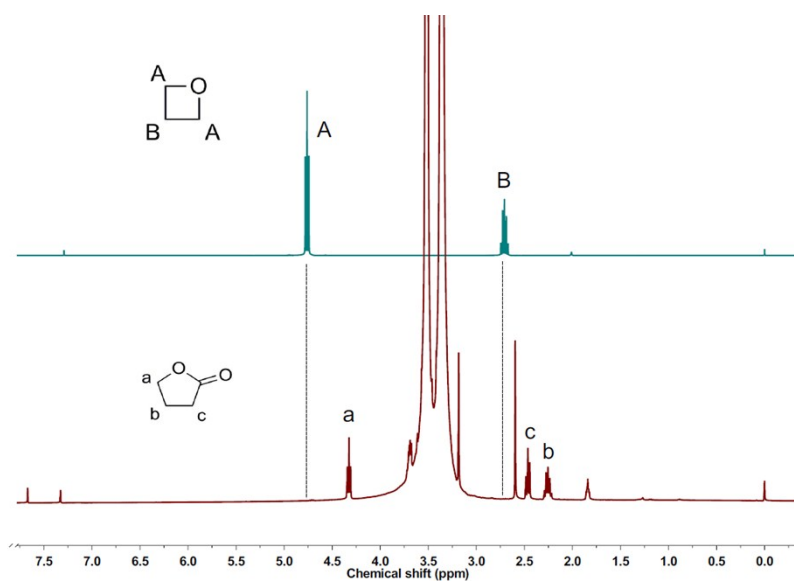

**Fig. S17**  $^1\text{H}$  NMR spectrum of the product from oxetane carbonylation in DME (Table 1, entry 6).

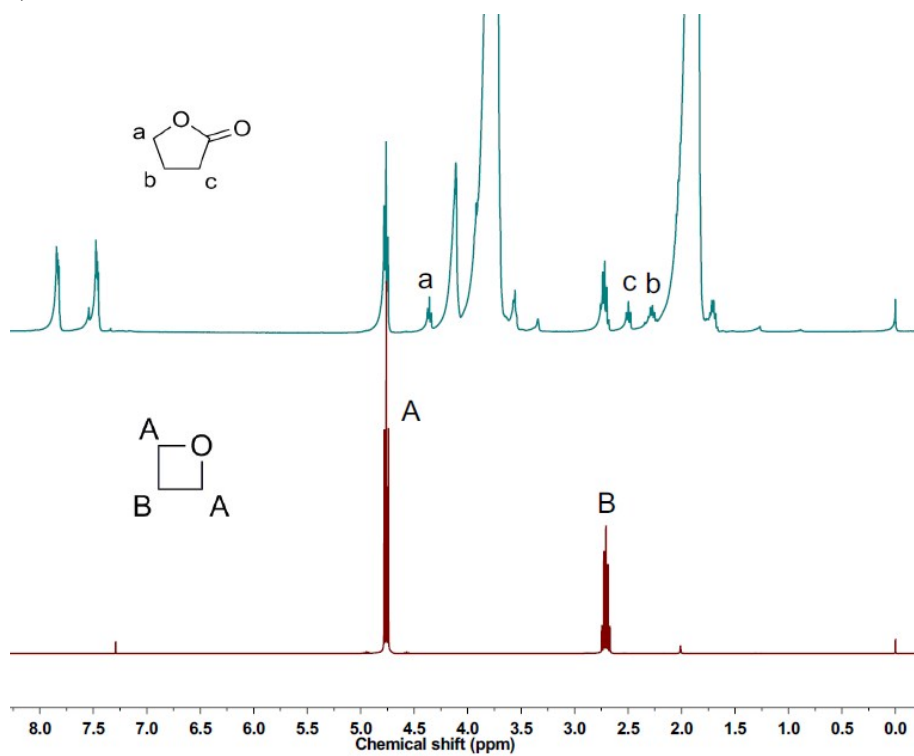

**Fig. S18**  $^1\text{H}$  NMR spectrum of the product from oxetane carbonylation in THF (Table 1-6).

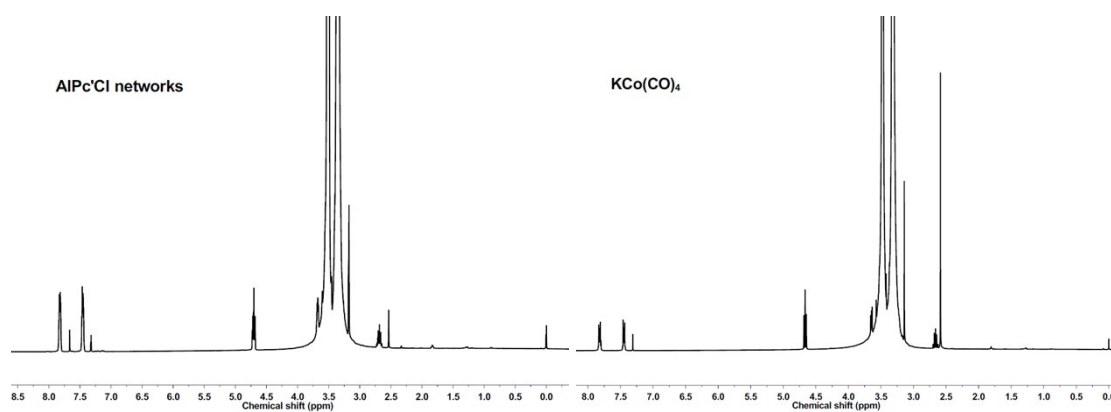

**Fig. S19**  $^1\text{H}$  NMR spectrum of the product from oxetane carbonylation using the network **2** or  $\text{KCo(CO)}_4$  alone.

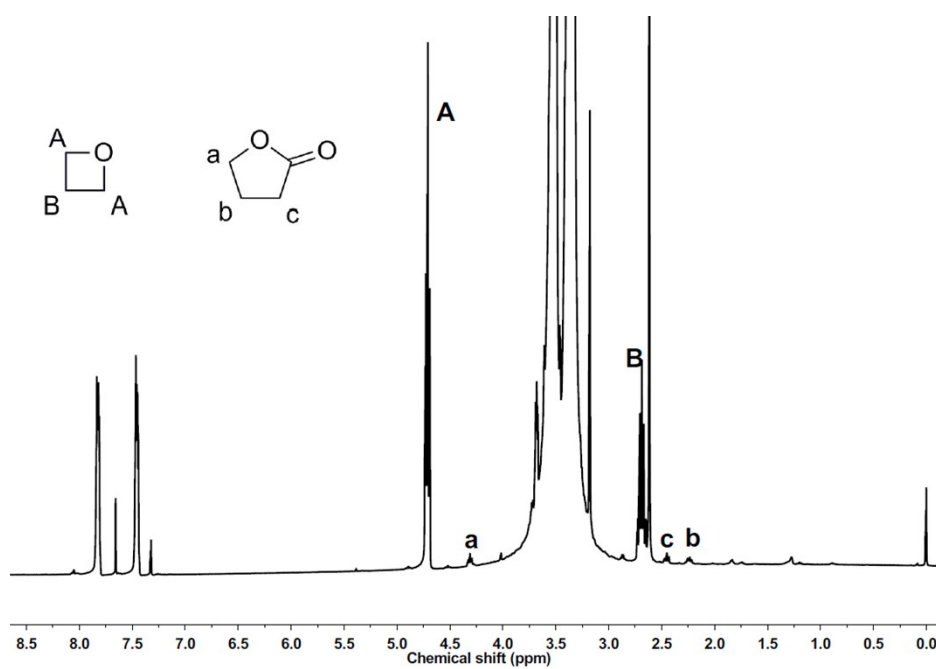

**Fig. S20**  $^1\text{H}$  NMR spectrum of the product from oxetane carbonylation using an equimolar mixture of the network **2** and  $\text{KCo(CO)}_4$ .

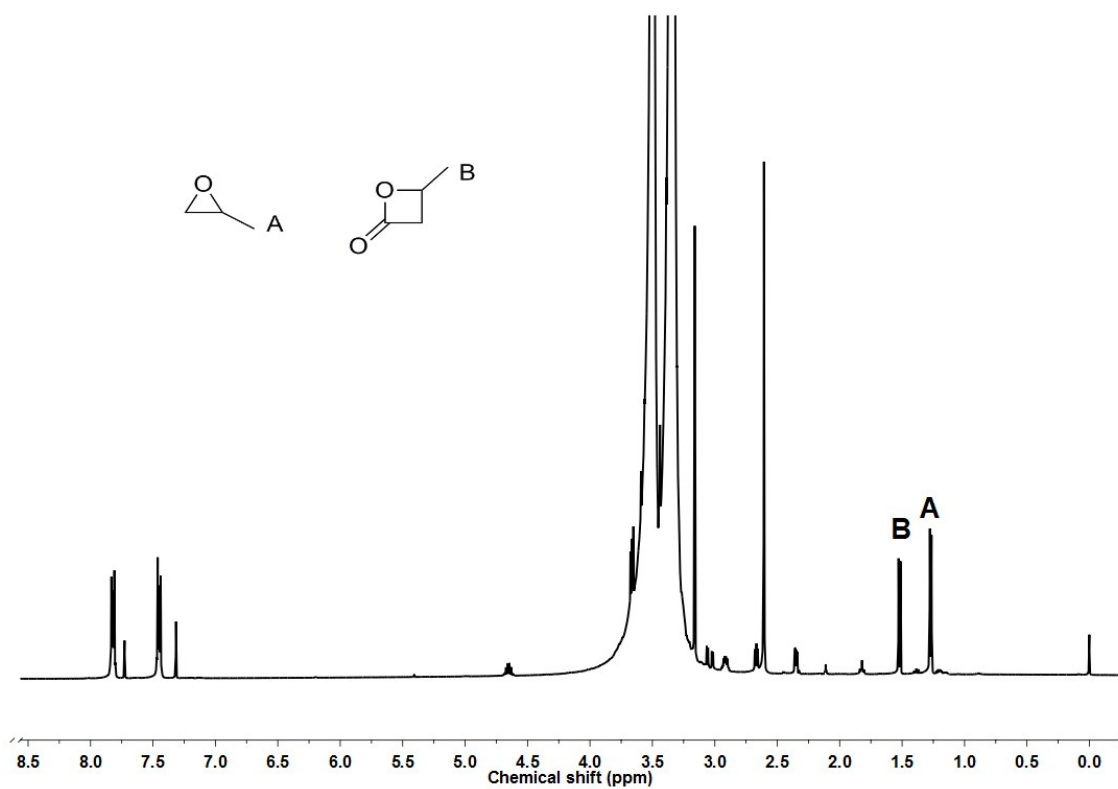

**Fig. S21**  $^1\text{H}$  NMR spectrum of the product from filtration test.

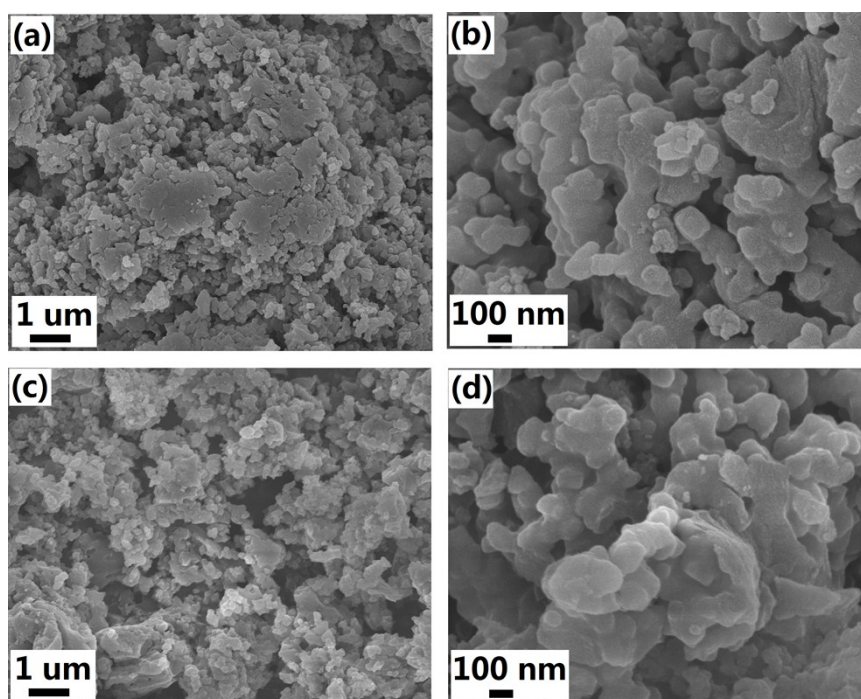

**Fig. S22** SEM images of catalyst **3** before (a, b) and after (c, d) 3 catalytic cycles.

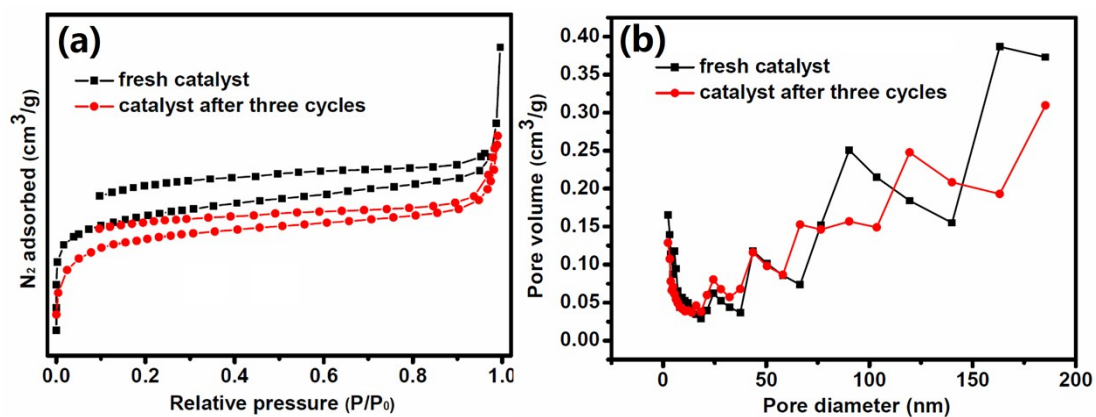

**Fig. S23** The BET surface areas (a) of catalyst before and after three catalytic cycles, with corresponding BJH pore-size distributions (b).
